# Supplementary material for: Extrafine Beclometasone Dipropionate/Formoterol NEXThaler on Device Usability, Adherence, Asthma Control and Quality of Life. A Panhellenic Prospective, Non-Interventional Observational Study in Patients with Asthma—The NEXT-Step Study
Source: MDPI journal article supplement (doi:10.3390/jpm12020146), 2022-01-22
Supplement: s1 [file s1]

*SUPPLEMENTARY APPENDIX*

# **EXTRAFINE BECLOMETASONE DIPROPIONATE/ FORMOTEROL NEXTHALER ON USABILITY OF DEVICE, ADHERENCE, ASTHMA CONTROL AND QUALITY OF LIFE. A PANHELLENIC PROSPECTIVE, NON-INTERVENTIONAL OBSERVATIONAL STUDY IN PATIENTS WITH ASTHMA - THE NEXT-STEP STUDY**

**Petros Bakakos<sup>1</sup>, Panagiotis Chatziapostolou<sup>2</sup>, Panos Katerelos<sup>3</sup>, Petros Efstathopoulos<sup>4</sup>, Aliko Korkontzelou<sup>5</sup> and Paraskevi Katsaounou<sup>6</sup>**

<sup>1</sup> 1<sup>st</sup> University Department of Respiratory Medicine, National and Kapodistrian University of Athens, Medical School, "Sotiria" Chest Diseases Hospital, 11527 Athens, Greece; petros44@hotmail.com

<sup>2</sup> Pulmonary Clinic, Euromedica General Clinic of Thessaloniki, 54645 Thessaloniki, Greece; panoshatzia-postolou@gmail.com

<sup>3</sup> BioStatistics PC; p.katerelos@bio-statistics.eu

<sup>4</sup> Chiesi Hellas S.A.; p.efstathopoulos@chiesi.com

<sup>5</sup> Chiesi Hellas S.A.; a.korkontzelou@chiesi.com

<sup>6</sup> Pulmonary and Respiratory Failure Dpt, First ICU, Evangelismos Hospital, Ipsilandou 45-7, 10676 Athens, Greece; paraskevikaounou@gmail.com

\* Correspondence: Korkontzelou Aliko; a.korkontzelou@chiesi.com

## 3.1. FSI-10

| Adjusted R <sup>2</sup> = 0.212 | Unstandardized Coefficients |       | Standardized Coefficients | t-statistic | p-value |
|---------------------------------|-----------------------------|-------|---------------------------|-------------|---------|
|                                 | B Coefficient               | S.E.  | Beta Coefficient          |             |         |
| Constant                        | 50.050                      | 0.435 |                           | 115.150     | <0.001  |
| Average MORISKY scale           | -1.467                      | 0.127 | -0.403                    | -11.570     | <0.001  |
| Age (years)                     | -0.041                      | 0.008 | -0.184                    | -5.209      | <0.001  |

Table 1 SA. Multiple Linear Regression analysis. Dependent variable: FSI-10 total score, average values of the two Visits.

## 3.2 Morisky scale

| Adjusted R <sup>2</sup> = 0.181 | Unstandardized Coefficients |       | Standardized Coefficients | t-statistic | p-value |
|---------------------------------|-----------------------------|-------|---------------------------|-------------|---------|
|                                 | B Coefficient               | S.E.  | Beta Coefficient          |             |         |
| Constant                        | 6.611                       | 0.505 |                           | 13.085      | <0.001  |
| FSI-10 total score              | -0.114                      | 0.010 | -0.414                    | -11.451     | <0.001  |
| Age (years)                     | -0.007                      | 0.002 | -0.121                    | -3.348      | 0.001   |
| ACQ-6 Total score               | -0.097                      | 0.032 | -0.106                    | -2.988      | 0.003   |

Table 2 SA. Multiple Linear Regression analysis. Dependent variable: Morisky scale, average values of the two Visits

## 3.3 Asthma control (ACQ-6)

| Adjusted R <sup>2</sup> = 0.737 | Unstandardized Coefficients |       | Standardized Coefficients | t-statistic | p-value |
|---------------------------------|-----------------------------|-------|---------------------------|-------------|---------|
|                                 | B Coefficient               | S.E.  | Beta Coefficient          |             |         |
| Constant                        | -2.080                      | 0.293 |                           | -7.094      | <0.001  |
| Baseline ACQ total score        | 0.828                       | 0.020 | 0.832                     | 41.138      | <0.001  |
| FSI-10 average total score      | 0.041                       | 0.006 | 0.135                     | 6.629       | <0.001  |

Table 3 SA. Multiple Linear Regression analysis. Dependent variable: ACQ-6

## 3.4 Quality of Life (AQLQ)

| Adjusted R <sup>2</sup> = 0.723 | Unstandardized Coefficients |       | Standardized Coefficients | t-statistic | p-value |
|---------------------------------|-----------------------------|-------|---------------------------|-------------|---------|
|                                 | B Coefficient               | S.E.  | Beta Coefficient          |             |         |
| Constant                        | 2.818                       | 0.322 |                           | 8.743       | <0.001  |
| Baseline AQLQ total score       | -0.802                      | 0.020 | -0.820                    | -39.512     | <0.001  |
| FSI-10 average total score      | 0.054                       | 0.007 | 0.174                     | 8.304       | <0.001  |

Table 4 SA. Multiple Linear Regression analysis. Dependent variable: AQLQ

## 3.5 Lung function

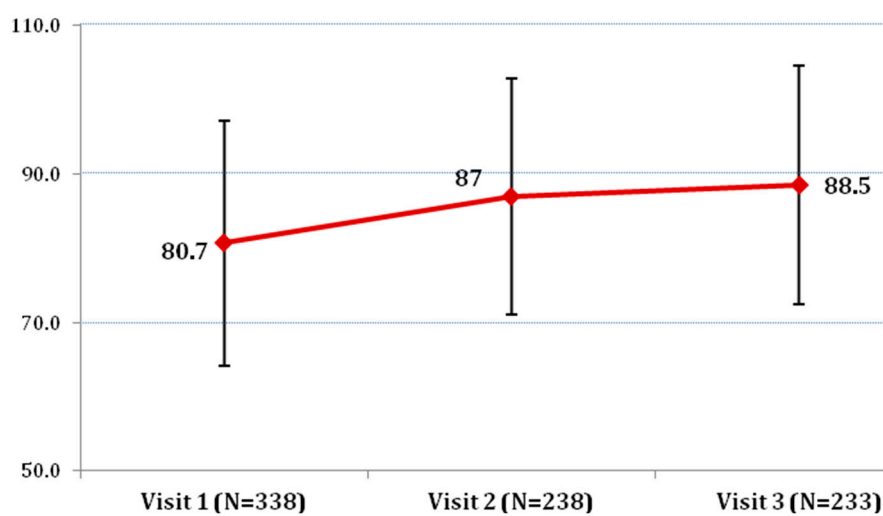

Figure 1 SA. FEV1% predicted /Mean  $\pm$  SD on the 3 Visits of the study. Base: Observed cases.

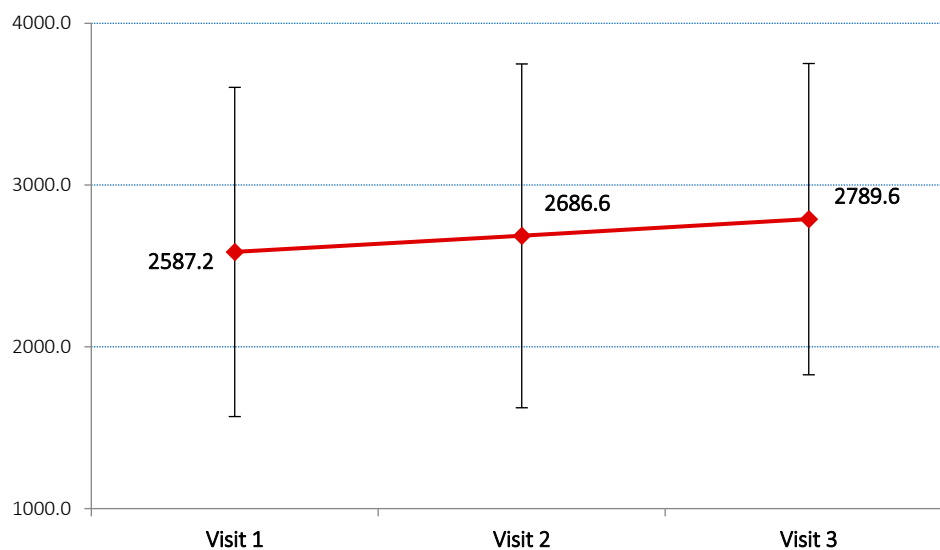

Figure 2 SA: FEV1 (mL) Mean  $\pm$  SD on the 3 Visits of the study. Base: Observed cases.

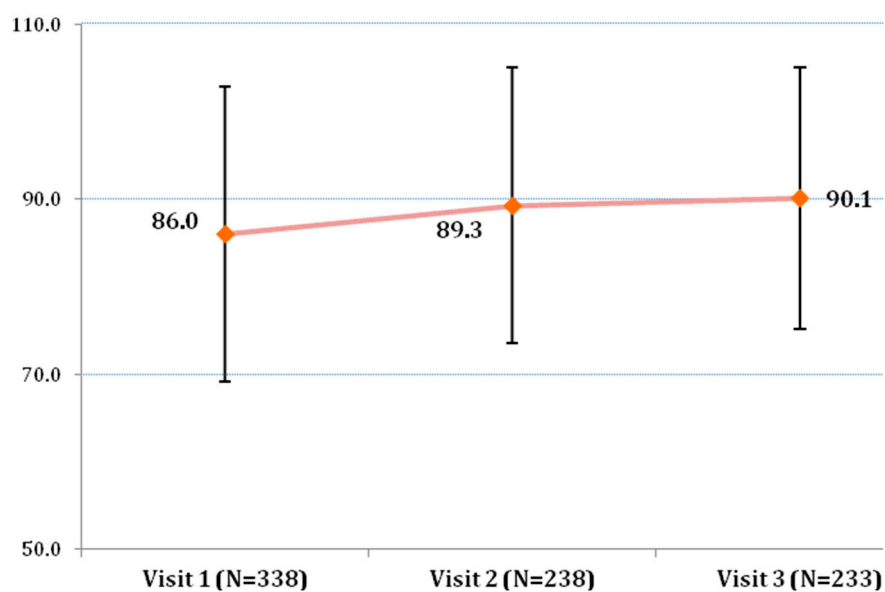

Figure 3 SA. FVC% predicted /Mean  $\pm$  SD on the 3 Visits of the study. Base: Observed cases.
